# Supplementary material for: Cediranib combined with carboplatin and paclitaxel in patients with metastatic or recurrent cervical cancer (CIRCCa): a randomised, double-blind, placebo-controlled phase 2 trial
Source: PubMed Central journal article supplement (PMC4705431; doi:10.1016/s1470-2045(15)00220-x), 2015-11

# THE LANCET Oncology

## Supplementary appendix

This appendix formed part of the original submission and has been peer reviewed. We post it as supplied by the authors.

Supplement to: Symonds RP, Gourley C, Davidson S, et al. Cediranib combined with carboplatin and paclitaxel in patients with metastatic or recurrent cervical cancer (CIRCCa): a randomised, double-blind, placebo-controlled phase 2 trial. *Lancet Oncol* 2015; published online Oct 14. [http://dx.doi.org/10.1016/S1470-2045\(15\)00220-X](http://dx.doi.org/10.1016/S1470-2045(15)00220-X).

## Supplementary Appendix

**Table 1S Eligibility**

|                                                                                                                                                                                                                                                                                                                                                        |
|--------------------------------------------------------------------------------------------------------------------------------------------------------------------------------------------------------------------------------------------------------------------------------------------------------------------------------------------------------|
| <b>Inclusion Criteria</b>                                                                                                                                                                                                                                                                                                                              |
| Over 18, life expectancy >12 weeks                                                                                                                                                                                                                                                                                                                     |
| ECOG performance status 0 or 1                                                                                                                                                                                                                                                                                                                         |
| Written informed consent                                                                                                                                                                                                                                                                                                                               |
| Histologically proven carcinoma of the cervix (squamous, adenocarcinoma or mixed adenosquamous)                                                                                                                                                                                                                                                        |
| Either                                                                                                                                                                                                                                                                                                                                                 |
| 1. Persistent or relapsed inoperable disease after radical radiotherapy within the irradiated pelvis                                                                                                                                                                                                                                                   |
| 2. Relapse after radical hysterectomy (after radical radiotherapy to the pelvis if appropriate)                                                                                                                                                                                                                                                        |
| 3. Extra pelvic metastases                                                                                                                                                                                                                                                                                                                             |
| 4. Stage IVb disease at diagnosis                                                                                                                                                                                                                                                                                                                      |
| Adequate haematological function – HB $\geq$ 10g/dl, neutrophils $\geq$ 1.5x10 <sup>9</sup> /l, platelets $\geq$ 100x10 <sup>9</sup> /l                                                                                                                                                                                                                |
| Adequate renal function – radioisotope measurement of glomerular filtration rate $\geq$ 35mls/min                                                                                                                                                                                                                                                      |
| Adequate liver function – bilirubin $\leq$ 1.5xULN, ALT or AST $\leq$ 2.5 (or $\leq$ 5xULN if hepatic metastases), alkaline phosphatase $\leq$ 2.5xULN (or $\leq$ 5xULN if hepatic metastases present)                                                                                                                                                 |
| Adequate coagulation – prothrombin ratio/INR $\leq$ 1.5 or PTR/INR between 2.0 and 3.0 for patients on stable doses of anticoagulants                                                                                                                                                                                                                  |
| Partial thromboplastin time <1.2 x control                                                                                                                                                                                                                                                                                                             |
| <b>Exclusion Criteria</b>                                                                                                                                                                                                                                                                                                                              |
| History of psychiatric disorder that would prevent informed consent and compliance                                                                                                                                                                                                                                                                     |
| Prior chemotherapy except cisplatin administered along with radiotherapy as primary treatment                                                                                                                                                                                                                                                          |
| Relapse potentially treatable with exenterative surgery                                                                                                                                                                                                                                                                                                |
| History of pelvic fistula                                                                                                                                                                                                                                                                                                                              |
| Acute or sub-acute intestinal obstruction                                                                                                                                                                                                                                                                                                              |
| History of inflammatory bowel disease                                                                                                                                                                                                                                                                                                                  |
| Active bleeding or non-healing wound, ulcer or fracture                                                                                                                                                                                                                                                                                                |
| Brain metastases, uncontrolled seizures, cerebro-vascular accidents/transient ischaemic attack, subarachnoid haemorrhage within 6 months                                                                                                                                                                                                               |
| Significant proteinuria $>$ 1.5g over 24 hours                                                                                                                                                                                                                                                                                                         |
| Poorly controlled hypertension or resting BP 150/100                                                                                                                                                                                                                                                                                                   |
| Sensory or motor neuropathy $\geq$ Grade 2                                                                                                                                                                                                                                                                                                             |
| History of spinal cord compression                                                                                                                                                                                                                                                                                                                     |
| Patients who have been treated with potent inhibitors of CYP3A4 and 2C8 within 2 weeks of the first planned dose of cediranib including amiodarone, clarithromycin, erythromycin, simvastatin, atorvastatin, lovastatin, montelukast, verapamil, ketoconazole, miconazole, indinovir and diltiazem (these drugs were not used during the trial period) |

**Table 2S Dose modifications of chemotherapy for haematological toxicity**

| <b>Delay in neutrophil recovery to <math>\geq 1.5 \times 10^9/l</math></b> | <b>Delay in platelet recovery to <math>\geq 100 \times 10^9/l</math></b> | <b>Dose modifications</b>                                         |
|----------------------------------------------------------------------------|--------------------------------------------------------------------------|-------------------------------------------------------------------|
| $\leq 7$ days                                                              | $\leq 7$ days                                                            | None                                                              |
| 7-14 days                                                                  | $\leq 7$ days                                                            | ↓ paclitaxel to 135mg/m <sup>2</sup><br>No change to carboplatin  |
| $\leq 7$ days                                                              | 7-14 days                                                                | No change to paclitaxel<br>↓ carboplatin by AUC of 1              |
| 7-14 days                                                                  | 7-14 days                                                                | ↓ paclitaxel to 135mg/m <sup>2</sup><br>↓ carboplatin by AUC of 1 |
| $> 14$ days                                                                | $> 14$ days                                                              | Withdraw from protocol treatment                                  |

**Table 3S Management of Hypertension**

|   |                                                                                                                                                                                                                                                                                             |
|---|---------------------------------------------------------------------------------------------------------------------------------------------------------------------------------------------------------------------------------------------------------------------------------------------|
| 1 | If blood pressure is >140/90 on 2 consecutive occasions more than 24 hours apart or an increase in diastolic blood pressure of at least 20mmHg continue cediranib/placebo at the same dosage and introduce treatment with a long acting calcium channel antagonist (CCA) such as nifedipine |
| 2 | If BP still >140/90 and has not responded after 24 hours increase dose of CCA                                                                                                                                                                                                               |
| 3 | If BP still >140/90 and has not responded after a further 24 hours add in another anti-hypertensive agent.                                                                                                                                                                                  |
| 4 | If 48 hours later BP remains uncontrolled or continues to increase, temporarily hold cediranib until BP <140/90                                                                                                                                                                             |
| 5 | Restart cediranib at same dose or as a dose reduction when BP ≤ 140/90                                                                                                                                                                                                                      |
| 6 | If BP remains uncontrolled or continues to increase despite dose reduction and maximal anti-hypertensive permanently stop cediranib                                                                                                                                                         |

**Table 4S: Sites and site recruitment**

| <b>Site Name</b>                       | <b>Principal Investigator</b> | <b>Total no. patients recruited</b> |
|----------------------------------------|-------------------------------|-------------------------------------|
| Christie Hospital                      | Dr Susan Davidson             | 25                                  |
| Royal Marsden Hospital (Fulham Rd)     | Dr Susana Banerjee            | 6                                   |
| St James's University Hospital         | Dr David Jackson              | 6                                   |
| Royal Marsden Hospital (Sutton)        | Dr Susana Banerjee            | 4                                   |
| Clatterbridge Centre for Oncology      | Dr Rosemary Lord              | 3                                   |
| Leicester Royal Infirmary              | Professor R Paul Symonds      | 3                                   |
| UCL Hospital                           | Dr Mary McCormack             | 3                                   |
| Velindre Hospital                      | Dr Emma Hudson                | 3                                   |
| Western General Hospital               | Professor Charles Gourley     | 3                                   |
| Beatson West of Scotland Cancer Centre | Professor Nick Reed           | 2                                   |
| Barts and London NHS Trust             | Dr Melanie Powell             | 2                                   |
| Dorset Cancer Centre, Poole Hospital   | Dr Maxine Flubacher           | 2                                   |
| Musgrove Park Hospital                 | Dr Petra Jankowska            | 2                                   |
| Wycombe Hospital                       | Dr Sally Trent                | 2                                   |
| Maidstone Hospital                     | Dr Rema Jyothiramayi          | 1                                   |
| Nottingham City Hospital               | Dr Steve Chan                 | 1                                   |
| Stoke Mandeville Hospital              | Dr Sally Trent                | 1                                   |

**Table 5S: Quality of Life Questionnaire Completion**

|                         | Study Arm |          |        |           |          |        |
|-------------------------|-----------|----------|--------|-----------|----------|--------|
|                         | Placebo   |          |        | Cediranib |          |        |
|                         | Completed | Expected | %      | Completed | Expected | %      |
| Baseline/Before Cycle 1 | 33        | 35       | 94.3%  | 33        | 34       | 97.1%  |
| Prior to Cycle 2        | 26        | 32       | 81.3%  | 26        | 31       | 83.9%  |
| Prior to Cycle 3        | 20        | 30       | 66.7%  | 24        | 30       | 80.0%  |
| Prior to Cycle 4        | 24        | 27       | 88.9%  | 24        | 28       | 85.7%  |
| Prior to Cycle 5        | 22        | 24       | 91.7%  | 20        | 25       | 80.0%  |
| Prior to Cycle 6        | 19        | 22       | 86.4%  | 21        | 25       | 84.0%  |
| End-of-chemotherapy     | 19        | 33       | 57.6%  | 18        | 28       | 64.3%  |
| Month 2 follow-up       | 13        | 13       | 100.0% | 13        | 18       | 72.2%  |
| Month 4 follow-up       | 5         | 6        | 83.3%  | 11        | 11       | 100.0% |
| Month 6 follow-up       | 5         | 4        | 125.0% | 7         | 8        | 87.5%  |
| Month 8 follow-up       | 3         | 4        | 75.0%  | 5         | 4        | 125.0% |
| Month 10 follow-up      | 3         | 3        | 100.0% | 3         | 4        | 75.0%  |
| Month 12 follow-up      | 2         | 3        | 66.7%  | 4         | 4        | 100.0% |

**Table 6S: EORTC QLQ-C30 Analysis Results - comparison of standardised adjusted AUC**

|                             | Unadjusted two-sided p-value | Adjusted* two-sided p-value |
|-----------------------------|------------------------------|-----------------------------|
| <b>Global health status</b> |                              |                             |
| Global health status        | 0.19                         | 0.50                        |
| <b>Functional scales</b>    |                              |                             |
| Physical functioning        | 0.051                        | 0.26                        |
| Role functioning            | 0.018                        | 0.14                        |
| Emotional functioning       | 0.70                         | 0.88                        |
| Cognitive functioning       | 0.27                         | 0.51                        |
| Social functioning          | 0.12                         | 0.47                        |
| <b>Symptom scales</b>       |                              |                             |
| Fatigue                     | 0.82                         | 0.88                        |
| Nausea and vomiting         | 0.99                         | 0.99                        |
| Pain                        | 0.36                         | 0.61                        |
| Dyspnoea                    | 0.82                         | 0.88                        |
| Insomnia                    | 0.21                         | 0.50                        |
| Appetite loss               | 0.23                         | 0.50                        |
| Constipation                | 0.83                         | 0.88                        |
| <b>Diarrhoea</b>            | <b>0.002</b>                 | <b>0.030</b>                |
| Financial difficulties      | 0.71                         | 0.88                        |

\*adjusted for multiple comparisons using the false-discovery rate approach

**Table 7S: EORTC QLQ-CX24 Analysis Results - comparison of standardised adjusted AUC**

|                            | Unadjusted two-sided p-value | Adjusted* two-sided p-value |
|----------------------------|------------------------------|-----------------------------|
| <b>EORTC QLQ-CX24</b>      |                              |                             |
| <b>Functional scales</b>   |                              |                             |
| Body image                 | 0.60                         | 0.83                        |
| Sexual activity            | 0.075                        | 0.23                        |
| Sexual enjoyment           | 0.36                         | 0.65                        |
| Sexual/vaginal functioning | 0.86                         | 0.87                        |
| <b>Symptom scales</b>      |                              |                             |
| Symptom experience         | 0.025                        | 0.23                        |
| Lymphoedema                | 0.066                        | 0.23                        |
| Peripheral neuropathy      | 0.15                         | 0.33                        |
| Menopausal symptoms        | 0.87                         | 0.87                        |
| Sexual worry               | 0.64                         | 0.83                        |

\*adjusted for multiple comparisons using the false-discovery rate approach

**Table 8S: Laboratory and Non-laboratory Adverse Events occurring in at least 10% of patients on either arm during study drug only period**

|                               | Placebo (n=32) |       |           |       |         |      |         |      | Cediranib (n=28) |       |           |       |         |      |         |      |
|-------------------------------|----------------|-------|-----------|-------|---------|------|---------|------|------------------|-------|-----------|-------|---------|------|---------|------|
|                               | Grade 0        |       | Grade 1/2 |       | Grade 3 |      | Grade 4 |      | Grade 0          |       | Grade 1/2 |       | Grade 3 |      | Grade 4 |      |
|                               | n              | %     | n         | %     | n       | %    | n       | %    | n                | %     | n         | %     | n       | %    | n       | %    |
| <b>Non-laboratory*</b>        |                |       |           |       |         |      |         |      |                  |       |           |       |         |      |         |      |
| Diarrhoea                     | 31             | 96.9% | 1         | 3.1%  | 0       | 0.0% | 0       | 0.0% | 18               | 64.3% | 9         | 32.1% | 1       | 3.6% | 0       | 0.0% |
| Fatigue                       | 28             | 87.5% | 3         | 9.4%  | 1       | 3.1% | 0       | 0.0% | 21               | 75.0% | 7         | 25.0% | 0       | 0.0% | 0       | 0.0% |
| Peripheral sensory neuropathy | 28             | 87.5% | 4         | 12.5% | 0       | 0.0% | 0       | 0.0% | 27               | 96.4% | 1         | 3.6%  | 0       | 0.0% | 0       | 0.0% |
| Vomiting                      | 32             | 100%  | 0         | 0.0%  | 0       | 0.0% | 0       | 0.0% | 25               | 89.3% | 3         | 10.7% | 0       | 0.0% | 0       | 0.0% |
| <b>Haematology</b>            |                |       |           |       |         |      |         |      |                  |       |           |       |         |      |         |      |
| Anaemia                       | 1              | 3.1%  | 31        | 96.9% | 0       | 0.0% | 0       | 0.0% | 7                | 25.0% | 20        | 71.4% | 1       | 3.6% | 0       | 0.0% |
| Neutropenia                   | 7              | 21.9% | 25        | 78.1% | 0       | 0.0% | 0       | 0.0% | 11               | 39.3% | 17        | 60.7% | 0       | 0.0% | 0       | 0.0% |
| Thrombocytopenia              | 7              | 21.9% | 25        | 78.1% | 0       | 0.0% | 0       | 0.0% | 11               | 39.3% | 16        | 57.1% | 1       | 3.6% | 0       | 0.0% |
| Leucopenia                    | 6              | 18.8% | 26        | 81.3% | 0       | 0.0% | 0       | 0.0% | 10               | 35.7% | 18        | 64.3% | 0       | 0.0% | 0       | 0.0% |
| <b>Biochemistry</b>           |                |       |           |       |         |      |         |      |                  |       |           |       |         |      |         |      |
| Alk Phos (High)               | 31             | 96.9% | 1         | 3.1%  | 0       | 0.0% | 0       | 0.0% | 25               | 89.3% | 3         | 10.7% | 0       | 0.0% | 0       | 0.0% |
| Creatinine (High)             | 32             | 100%  | 0         | 0.0%  | 0       | 0.0% | 0       | 0.0% | 25               | 89.3% | 3         | 10.7% | 0       | 0.0% | 0       | 0.0% |
| Potassium (Low)               | 31             | 96.9% | 1         | 3.1%  | 0       | 0.0% | 0       | 0.0% | 25               | 89.3% | 3         | 10.7% | 0       | 0.0% | 0       | 0.0% |

\*Relationship to either chemotherapy or study drug must be at least "possible"

**Table 9S: Laboratory and Non-laboratory Adverse Events occurring in less than 10% of patients, but 1 or more is grade 3/4/5**

|                                    | Placebo |       |           |      |         |      |         |      |         |      | Cediranib |       |           |      |         |      |         |      |         |      |
|------------------------------------|---------|-------|-----------|------|---------|------|---------|------|---------|------|-----------|-------|-----------|------|---------|------|---------|------|---------|------|
|                                    | Grade 0 |       | Grade 1/2 |      | Grade 3 |      | Grade 4 |      | Grade 5 |      | Grade 0   |       | Grade 1/2 |      | Grade 3 |      | Grade 4 |      | Grade 5 |      |
|                                    | n       | %     | n         | %    | n       | %    | n       | %    | n       | %    | n         | %     | n         | %    | n       | %    | n       | %    | n       | %    |
| <b>Chemotherapy and trial drug</b> |         |       |           |      |         |      |         |      |         |      |           |       |           |      |         |      |         |      |         |      |
| <b>Non-laboratory*</b>             |         |       |           |      |         |      |         |      |         |      |           |       |           |      |         |      |         |      |         |      |
| Anaphylaxis                        | 34      | 97.1% | 1         | 2.9% | 0       | 0.0% | 0       | 0.0% | 0       | 0.0% | 31        | 96.9% | 0         | 0.0% | 1       | 3.1% | 0       | 0.0% | 0       | 0.0% |
| Bronchospasm                       | 35      | 100%  | 0         | 0.0% | 0       | 0.0% | 0       | 0.0% | 0       | 0.0% | 31        | 96.9% | 0         | 0.0% | 1       | 3.1% | 0       | 0.0% | 0       | 0.0% |
| Colonic perforation                | 35      | 100%  | 0         | 0.0% | 0       | 0.0% | 0       | 0.0% | 0       | 0.0% | 31        | 96.9% | 0         | 0.0% | 0       | 0.0% | 0       | 0.0% | 1       | 3.1% |
| Dehydration                        | 35      | 100%  | 0         | 0.0% | 0       | 0.0% | 0       | 0.0% | 0       | 0.0% | 30        | 93.8% | 1         | 3.1% | 1       | 3.1% | 0       | 0.0% | 0       | 0.0% |
| Hematuria                          | 34      | 97.1% | 0         | 0.0% | 1       | 2.9% | 0       | 0.0% | 0       | 0.0% | 32        | 100%  | 0         | 0.0% | 0       | 0.0% | 0       | 0.0% | 0       | 0.0% |
| Hypotension                        | 35      | 100%  | 0         | 0.0% | 0       | 0.0% | 0       | 0.0% | 0       | 0.0% | 31        | 96.9% | 0         | 0.0% | 1       | 3.1% | 0       | 0.0% | 0       | 0.0% |
| Lymph gland infection              | 35      | 100%  | 0         | 0.0% | 0       | 0.0% | 0       | 0.0% | 0       | 0.0% | 31        | 96.9% | 0         | 0.0% | 1       | 3.1% | 0       | 0.0% | 0       | 0.0% |
| Rectal hemorrhage                  | 35      | 100%  | 0         | 0.0% | 0       | 0.0% | 0       | 0.0% | 0       | 0.0% | 31        | 96.9% | 0         | 0.0% | 1       | 3.1% | 0       | 0.0% | 0       | 0.0% |
| Vaginal discharge                  | 34      | 97.1% | 0         | 0.0% | 1       | 2.9% | 0       | 0.0% | 0       | 0.0% | 32        | 100%  | 0         | 0.0% | 0       | 0.0% | 0       | 0.0% | 0       | 0.0% |
| Vaginal hemorrhage                 | 34      | 97.1% | 0         | 0.0% | 1       | 2.9% | 0       | 0.0% | 0       | 0.0% | 31        | 96.9% | 1         | 3.1% | 0       | 0.0% | 0       | 0.0% | 0       | 0.0% |
| Wound infection                    | 35      | 100%  | 0         | 0.0% | 0       | 0.0% | 0       | 0.0% | 0       | 0.0% | 31        | 96.9% | 0         | 0.0% | 1       | 3.1% | 0       | 0.0% | 0       | 0.0% |
| <b>Trial drug only</b>             |         |       |           |      |         |      |         |      |         |      |           |       |           |      |         |      |         |      |         |      |
| <b>Non-laboratory*</b>             |         |       |           |      |         |      |         |      |         |      |           |       |           |      |         |      |         |      |         |      |
| Thromboembolic event               | 32      | 100%  | 0         | 0.0% | 0       | 0.0% | 0       | 0.0% | 0       | 0.0% | 27        | 96.4% | 0         | 0.0% | 1       | 3.6% | 0       | 0.0% | 0       | 0.0% |
| <b>Biochemistry</b>                |         |       |           |      |         |      |         |      |         |      |           |       |           |      |         |      |         |      |         |      |
| Bilirubin (High)                   | 32      | 100%  | 0         | 0.0% | 0       | 0.0% | 0       | 0.0% | 0       | 0.0% | 26        | 92.9% | 1         | 3.6% | 1       | 3.6% | 0       | 0.0% | 0       | 0.0% |
| Calcium (Low)                      | 32      | 100%  | 0         | 0.0% | 0       | 0.0% | 0       | 0.0% | 0       | 0.0% | 27        | 96.4% | 0         | 0.0% | 1       | 3.6% | 0       | 0.0% | 0       | 0.0% |

\*Relationship to either chemotherapy or study drug must be at least "possible"

**Fig 1S Forest plot showing the effect of cediranib (experimental) versus placebo (control) on PFS (hazard ratio and 95% confidence intervals; p-values for test for heterogeneity of HR) stratified according to key patient/disease factors**

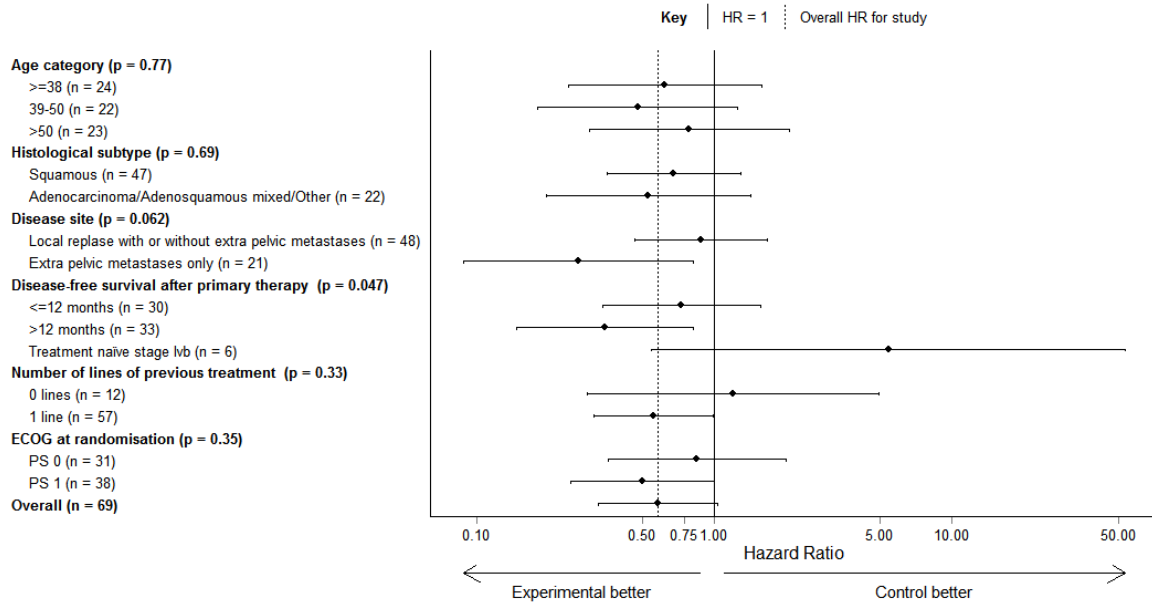



**Fig 2S Forest plot showing the effect of cediranib (experimental) versus placebo (control) on OS (hazard ratio and 95% confidence intervals; p-values for test for heterogeneity of HR) stratified according to key patient/disease factors**

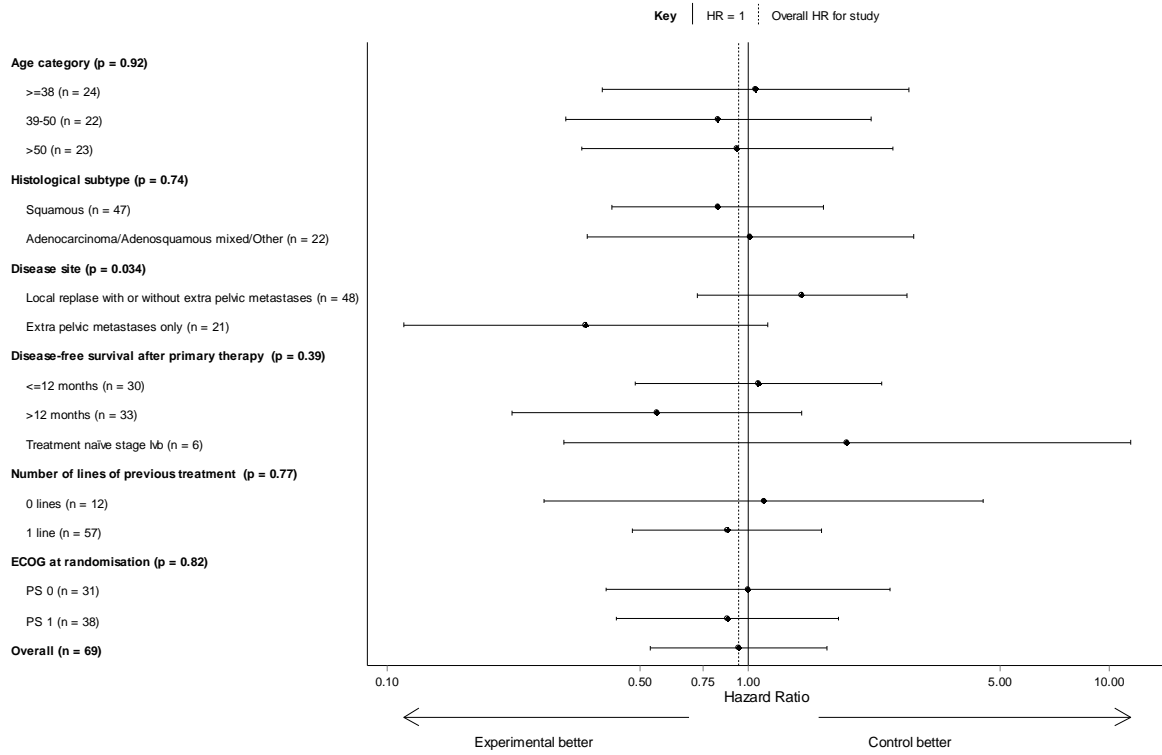

Supplement: mmc1.pdf [file mmc1.pdf]
